# Supplementary material for: Effects of contrast-enhancement, reconstruction slice thickness and convolution kernel on the diagnostic performance of radiomics signature in solitary pulmonary nodule
Source: PubMed Central journal article supplement (PMC5056507; doi:10.1038/srep34921), 2016-10-10
Supplement: srep34921-s1.pdf [file srep34921-s1.pdf]

**Supplementary information for:**

**Effects of contrast-enhancement, reconstruction slice thickness and convolution kernel on the diagnostic performance of radiomics signature in solitary pulmonary nodule**

Lan He<sup>1,2+</sup>, Yanqi Huang<sup>1+</sup>, Zelan Ma<sup>1</sup>, Cuishan Liang<sup>1</sup>, Changhong Liang<sup>1\*</sup>, Zaiyi Liu<sup>1\*</sup>

<sup>1</sup>Department of Radiology, Guangdong General Hospital, Guangdong Academy of Medical Sciences, Guangzhou, Guangdong, 510080, China,

<sup>2</sup>School of Medicine, South China University of Technology, Guangzhou, Guangdong, 510006, China.

Correspondence and requests for materials should be addressed to Z.L. ([zyliu@163.com](mailto:zyliu@163.com)) or C.L. ([cjr.lchh@vip.163.com](mailto:cjr.lchh@vip.163.com))

Other authors' Email-addresses are as follows: L.H. ([helan0811@126.com](mailto:helan0811@126.com)); Y.H. ([yikiann@126.com](mailto:yikiann@126.com)); Z.M. ([zelanma@163.com](mailto:zelanma@163.com)); C.L. ([405821317@qq.com](mailto:405821317@qq.com)).

<sup>+</sup>these authors contributed equally to this work

This work was supported by the National Natural Scientific Foundation of China (No. 81271569 and No.81271654)

## **Supplementary Method S1:** The algorithm for radiomics features calculation

The features included gray-level histogram features and gray-level co-occurrence matrix features. The characteristics of gray-level histogram features were quantified using first-order statistics, calculated from the histogram of all tumor pixel intensity values. Gray-level co-occurrence matrix features are available to quantify intra-tumor heterogeneity differences within the tumor. The features of gray-level histogram and gray-level co-occurrence matrix were extracted from the CT image without / after a filtration of the Laplacian of Gaussian filter (filter parameter = 1.0, 1.5, 2.0, 2.5, respectively).

### *1. Laplacian of Gaussian filtration for gray-level histogram features and gray-level co-occurrence matrix features*

The Laplacian of Gaussian filter ( $\nabla^2 G$ ) distribution is given by

$$\nabla^2 G(x, y) = \frac{-1}{\pi\sigma^4} \left(1 - \frac{x^2 + y^2}{2\sigma^2}\right) e^{-\left(\frac{x^2 + y^2}{2\sigma^2}\right)}$$

$x, y$  denote the spatial coordinates of the pixel and  $\sigma$  is the value of filter parameter.

### *2. Gray-level histogram features:*

$X(i)$  indicates the intensity of gray level  $i$ ,  $N$  denotes the sum of pixels in the image.  $\beta$  indicates the top percentage of the histogram curve, which could be 50%, 25%, and 10%,  $M$  denotes the number of pixels in the histogram on the percentage of  $(1 - \beta)$ .

#### *1) Mean*

$$mean = \frac{1}{N} \sum_{i=1}^N X(i)$$

2) SD

$$SD = \frac{1}{N} \sum_{i=1}^N (X(i) - \bar{X})^2$$

3) Percentile mean and Percentile SD

$$mean_{\beta} = \frac{1}{N - M} \sum_{i=M}^N X(i)$$

$$SD_{\beta} = \frac{1}{N - M} \sum_{i=M}^N (X(i) - \bar{X})^2$$

4) Kurtosis

$$kurtosis = \frac{\frac{1}{N} \sum_{i=1}^N (X(i) - \bar{X})^4}{\left( \sqrt{\frac{1}{N} \sum_{i=1}^N (X(i) - \bar{X})^2} \right)^4}$$

5) Skewness

$$skewness = \frac{\frac{1}{N} \sum_{i=1}^N (X(i) - \bar{X})^3}{\left( \sqrt{\frac{1}{N} \sum_{i=1}^N (X(i) - \bar{X})^2} \right)^3}$$

3. Gray-level co-occurrence matrix features:

Gray-level co-occurrence matrix is second-order statistical texture feature, which is defined as a matrix  $P(i,j)$  to indicate the relative frequency with intensity values of two pixels ( $i$  and  $j$ ) at the one distances ( $\delta=1$ ) and in four directions ( $0^\circ$ ,  $45^\circ$ ,  $90^\circ$ ,  $135^\circ$ ).  $N_g$  is the number of discrete intensity levels in the image.  $x,y$  denote the spatial coordinates of the pixel.  $\mu$ ,  $\mu_x(i)$ ,  $\mu_y(j)$  is the mean of  $P(i,j)$ ,  $P_x(i)$ ,  $P_y(j)$ , and  $\sigma_x(i)$ ,  $\sigma_y(j)$  is the standard deviation of  $P_x(i)$ ,  $P_y(j)$ , respectively. Texture matrixes were determined considering  $5 \times 5$

matrixes. In this study, distance  $\delta$  was set to 1 and direction to each of the 4 directions, yielding a total of 4 gray level co-occurrence matrices for each image. From these gray-level co-occurrence matrices, several textures features are derived.

1) *Contrast*

$$contrast = \sum_{i=1}^{N_g} \sum_{j=1}^{N_g} |i - j|^2 P(i, j)$$

2) *Correlation*

$$correlation = \frac{\sum_{i=1}^{N_g} \sum_{j=1}^{N_g} ijP(i, j) - \mu_i(i)\mu_j(j)}{\sigma_x(i)\sigma_y(j)}$$

3) *Entropy*

$$entropy = - \sum_{i=1}^{N_g} \sum_{j=1}^{N_g} P(i, j) \log[P(i, j)]$$

4) *Energy*

$$energy = \sum_{i=1}^{N_g} \sum_{j=1}^{N_g} [P(i, j)]^2$$

5) *Homogeneity*

$$homogeneity = \sum_{i=1}^{N_g} \sum_{j=1}^{N_g} \frac{P(i, j)}{1 + |i - j|^2}$$

### **Supplementary Equations S1**

$$\begin{aligned} \text{Score} = & -1.78771807 + 13.212427 \times \text{homogeneity\_90\_0} + 18.54771 \times \text{entropy\_135\_0} \\ & + 1.0421137000 \times \text{entropy\_135\_1.0} - 0.002951890 \times \text{his\_50\_mean\_1.0} \\ & + 0.0053501100 \times \text{his\_25\_mean\_1.0} - 0.0000172400 \times \text{his\_mean\_0} \\ & + 9.09550720 \times \text{homogeneity\_90\_1.5} - 0.00171663 \times \text{his\_mean\_2.0} \\ & - 7.87378419 \times \text{energy\_135\_1.5} - 13.14641130 \times \text{homogeneity\_45\_1.5} \\ & - 29.415270830 \times \text{homogeneity\_90\_2.5} - 13.27280731 \times \text{entropy\_0\_2.5} \end{aligned}$$

### **Supplementary Equations S2**

$$\begin{aligned} \text{Score} = & -22.511849 - 40.800501 \times \text{energy\_45\_0} - 2.461693 \times \text{skewness\_1.0} \\ & + 12.073593 \times \text{entropy\_45\_1.0} - 5.159926 \times \text{homogeneity\_135\_2.0} \end{aligned}$$

### **Supplementary Equations S3**

$$\begin{aligned} \text{Score} = & 18.129660 - 51.721882 \times \text{energy\_45\_1.0} - 88.518050 \times \text{energy\_135\_1.0} \\ & - 8.326476 \times \text{homogeneity\_90\_1.0} \end{aligned}$$

### **Supplementary Equations S4**

$$\begin{aligned} \text{Score} = & -24.131532 + 6.607335 \times \text{entropy\_45\_0} + 5.495184 \times \text{entropy\_45\_1.0} - 9.753482 \times \\ & \text{homogeneity\_90\_2.0} \end{aligned}$$

**Supplementary Table S1.** The size and the diameter of the delineations of ROI for 2 patients who have benign and malignant tumor, respectively.

| Group | Benign  |          | Malignant |          |
|-------|---------|----------|-----------|----------|
|       | Size    | Diameter | Size      | Diameter |
| 1     | 792.330 | 35.155   | 208.603   | 15.871   |
| 2     | 780.833 | 33.084   | 212.640   | 16.610   |
| 3     | 782.832 | 35.155   | 206.584   | 16.980   |
| 4     | 790.331 | 34.438   | 209.948   | 16.536   |

**Note:** Group 1 = non-contrast + 1.25 mm + standard convolution kernel; Group 2 = contrast enhancement + 1.25 mm + standard convolution kernel; Group 3 = non-contrast + 5 mm + standard convolution kernel; Group 4 = non-contrast + 5 mm + lung convolution kernel.

**Supplementary Table S2.** Intra-class correlation coefficients (ICCs) values for radiomics features

| Radiomics features                            | Group 1 |       |       |       |       | Group 2 |       |       |       |       | Group 3 |       |       |       |       | Group 4 |       |       |       |       |
|-----------------------------------------------|---------|-------|-------|-------|-------|---------|-------|-------|-------|-------|---------|-------|-------|-------|-------|---------|-------|-------|-------|-------|
|                                               | 0       | 1.0   | 1.5   | 2.0   | 2.5   | 0       | 1.0   | 1.5   | 2.0   | 2.5   | 0       | 1.0   | 1.5   | 2.0   | 2.5   | 0       | 1.0   | 1.5   | 2.0   | 2.5   |
| <b>Gray-level</b>                             |         |       |       |       |       |         |       |       |       |       |         |       |       |       |       |         |       |       |       |       |
| kurtosis                                      | 0.913   | 0.960 | 0.892 | 0.855 | 0.833 | 0.962   | 0.932 | 0.961 | 0.962 | 0.967 | 0.986   | 0.972 | 0.988 | 0.990 | 0.990 | 0.982   | 0.964 | 0.983 | 0.988 | 0.989 |
| skewness                                      | 0.907   | 0.843 | 0.882 | 0.832 | 0.817 | 0.878   | 0.878 | 0.880 | 0.906 | 0.912 | 0.871   | 0.841 | 0.889 | 0.922 | 0.931 | 0.981   | 0.914 | 0.879 | 0.905 | 0.914 |
| his_mean                                      | 0.995   | 0.995 | 0.995 | 0.995 | 0.995 | 0.998   | 0.998 | 0.998 | 0.998 | 0.998 | 0.997   | 0.997 | 0.997 | 0.997 | 0.997 | 0.993   | 0.993 | 0.993 | 0.993 | 0.993 |
| his_SD                                        | 0.995   | 0.993 | 0.990 | 0.995 | 0.990 | 0.991   | 0.996 | 0.992 | 0.994 | 0.998 | 0.994   | 0.999 | 0.994 | 0.993 | 0.995 | 0.998   | 0.992 | 0.998 | 0.996 | 0.998 |
| his_50_mean                                   | 0.997   | 0.997 | 0.998 | 0.997 | 0.997 | 0.999   | 0.999 | 0.999 | 0.999 | 0.999 | 0.999   | 0.999 | 0.999 | 0.999 | 0.999 | 0.998   | 0.983 | 0.998 | 0.998 | 0.998 |
| his_50_SD                                     | 0.994   | 0.993 | 0.989 | 0.994 | 0.990 | 0.990   | 0.996 | 0.991 | 0.993 | 0.997 | 0.994   | 0.999 | 0.993 | 0.992 | 0.995 | 0.997   | 0.990 | 0.997 | 0.995 | 0.998 |
| his_25_mean                                   | 0.916   | 0.801 | 0.809 | 0.975 | 0.984 | 0.999   | 0.816 | 0.999 | 0.999 | 0.999 | 1.000   | 0.858 | 1     | 1.000 | 0.991 | 0.998   | 0.757 | 0.999 | 0.999 | 0.999 |
| his_25_SD                                     | 0.935   | 0.750 | 0.616 | 0.981 | 0.989 | 0.987   | 0.902 | 0.989 | 0.992 | 0.997 | 0.992   | 0.749 | 0.991 | 0.991 | 0.993 | 0.997   | 0.841 | 0.997 | 0.994 | 0.998 |
| his_10_mean                                   | 0.992   | 0.836 | 0.996 | 0.993 | 0.995 | 0.993   | 0.881 | 0.986 | 0.997 | 0.986 | 0.989   | 0.879 | 0.942 | 1.000 | 0.999 | 0.943   | 0.778 | 0.819 | 0.992 | 0.980 |
| his_10_SD                                     | 0.999   | 0.869 | 0.999 | 0.999 | 1     | 0.981   | 0.763 | 0.981 | 0.987 | 0.997 | 0.986   | 0.798 | 0.974 | 0.985 | 0.990 | 0.994   | 0.790 | 0.762 | 0.987 | 0.994 |
| <b>Gray-Level Co-Occurrence Matrix (GLCM)</b> |         |       |       |       |       |         |       |       |       |       |         |       |       |       |       |         |       |       |       |       |
| Contrast                                      |         |       |       |       |       |         |       |       |       |       |         |       |       |       |       |         |       |       |       |       |
| 0                                             | 0.989   | 0.975 | 0.966 | 0.970 | 0.978 | 0.996   | 0.991 | 0.992 | 0.991 | 0.992 | 0.995   | 0.976 | 0.990 | 0.986 | 0.983 | 0.993   | 0.984 | 0.989 | 0.989 | 0.988 |
| 45                                            | 0.926   | 0.989 | 0.856 | 0.750 | 0.710 | 0.994   | 0.998 | 0.993 | 0.993 | 0.993 | 0.988   | 0.976 | 0.983 | 0.977 | 0.973 | 0.988   | 0.979 | 0.977 | 0.965 | 0.965 |
| 90                                            | 0.978   | 0.988 | 0.966 | 0.961 | 0.964 | 0.992   | 0.990 | 0.987 | 0.986 | 0.987 | 0.995   | 0.991 | 0.990 | 0.981 | 0.976 | 0.993   | 0.991 | 0.991 | 0.987 | 0.987 |
| 135                                           | 0.962   | 0.974 | 0.842 | 0.752 | 0.757 | 0.990   | 0.987 | 0.983 | 0.977 | 0.975 | 0.994   | 0.992 | 0.985 | 0.968 | 0.961 | 0.988   | 0.985 | 0.981 | 0.975 | 0.975 |
| Correlation                                   |         |       |       |       |       |         |       |       |       |       |         |       |       |       |       |         |       |       |       |       |
| 0                                             | 0.989   | 0.991 | 0.981 | 0.968 | 0.948 | 0.996   | 0.995 | 0.994 | 0.994 | 0.993 | 0.996   | 0.977 | 0.992 | 0.988 | 0.986 | 0.994   | 0.989 | 0.991 | 0.992 | 0.991 |

|             |       |       |       |       |       |       |       |       |       |       |       |       |       |       |       |       |       |       |       |       |
|-------------|-------|-------|-------|-------|-------|-------|-------|-------|-------|-------|-------|-------|-------|-------|-------|-------|-------|-------|-------|-------|
| 45          | 0.950 | 0.934 | 0.919 | 0.913 | 0.908 | 0.991 | 0.987 | 0.992 | 0.995 | 0.995 | 0.994 | 0.969 | 0.993 | 0.988 | 0.988 | 0.994 | 0.989 | 0.994 | 0.991 | 0.991 |
| 90          | 0.978 | 0.968 | 0.960 | 0.967 | 0.971 | 0.992 | 0.990 | 0.989 | 0.991 | 0.990 | 0.996 | 0.994 | 0.995 | 0.992 | 0.988 | 0.993 | 0.991 | 0.993 | 0.991 | 0.991 |
| 135         | 0.987 | 0.994 | 0.981 | 0.983 | 0.983 | 0.992 | 0.991 | 0.994 | 0.992 | 0.990 | 0.998 | 0.994 | 0.998 | 0.993 | 0.989 | 0.991 | 0.988 | 0.989 | 0.990 | 0.990 |
| Entropy     |       |       |       |       |       |       |       |       |       |       |       |       |       |       |       |       |       |       |       |       |
| 0           | 0.998 | 0.941 | 0.995 | 0.981 | 0.975 | 0.995 | 0.987 | 0.992 | 0.989 | 0.988 | 0.991 | 0.989 | 0.989 | 0.992 | 0.992 | 0.995 | 0.994 | 0.992 | 0.990 | 0.991 |
| 45          | 0.995 | 0.888 | 0.995 | 0.969 | 0.958 | 0.993 | 0.985 | 0.991 | 0.988 | 0.988 | 0.992 | 0.984 | 0.991 | 0.995 | 0.993 | 0.994 | 0.989 | 0.992 | 0.991 | 0.993 |
| 90          | 0.993 | 0.953 | 0.992 | 0.987 | 0.970 | 0.996 | 0.990 | 0.994 | 0.992 | 0.991 | 0.991 | 0.987 | 0.990 | 0.991 | 0.992 | 0.995 | 0.991 | 0.992 | 0.993 | 0.995 |
| 135         | 0.993 | 0.966 | 0.987 | 0.969 | 0.958 | 0.996 | 0.988 | 0.994 | 0.993 | 0.993 | 0.988 | 0.986 | 0.988 | 0.992 | 0.993 | 0.995 | 0.993 | 0.993 | 0.994 | 0.995 |
| Energy      |       |       |       |       |       |       |       |       |       |       |       |       |       |       |       |       |       |       |       |       |
| 0           | 0.998 | 0.939 | 0.996 | 0.979 | 0.972 | 0.995 | 0.990 | 0.992 | 0.989 | 0.989 | 0.991 | 0.992 | 0.990 | 0.993 | 0.993 | 0.996 | 0.997 | 0.992 | 0.992 | 0.994 |
| 45          | 0.995 | 0.793 | 0.995 | 0.974 | 0.966 | 0.995 | 0.992 | 0.992 | 0.990 | 0.990 | 0.994 | 0.991 | 0.993 | 0.995 | 0.994 | 0.997 | 0.995 | 0.995 | 0.995 | 0.995 |
| 90          | 0.992 | 0.928 | 0.996 | 0.982 | 0.965 | 0.996 | 0.993 | 0.994 | 0.991 | 0.991 | 0.991 | 0.991 | 0.992 | 0.992 | 0.992 | 0.996 | 0.994 | 0.993 | 0.994 | 0.995 |
| 135         | 0.997 | 0.958 | 0.995 | 0.969 | 0.962 | 0.996 | 0.993 | 0.994 | 0.993 | 0.993 | 0.990 | 0.991 | 0.991 | 0.993 | 0.993 | 0.995 | 0.996 | 0.993 | 0.995 | 0.996 |
| Homogeneity |       |       |       |       |       |       |       |       |       |       |       |       |       |       |       |       |       |       |       |       |
| 0           | 0.986 | 0.996 | 0.951 | 0.888 | 0.854 | 0.991 | 0.985 | 0.982 | 0.980 | 0.980 | 0.986 | 0.974 | 0.980 | 0.977 | 0.975 | 0.992 | 0.981 | 0.988 | 0.988 | 0.987 |
| 45          | 0.915 | 0.868 | 0.930 | 0.921 | 0.889 | 0.992 | 0.984 | 0.982 | 0.976 | 0.979 | 0.978 | 0.975 | 0.970 | 0.965 | 0.963 | 0.986 | 0.972 | 0.979 | 0.965 | 0.963 |
| 90          | 0.962 | 0.919 | 0.953 | 0.968 | 0.973 | 0.993 | 0.990 | 0.987 | 0.980 | 0.980 | 0.992 | 0.980 | 0.985 | 0.978 | 0.975 | 0.992 | 0.987 | 0.987 | 0.983 | 0.982 |
| 135         | 0.885 | 0.980 | 0.785 | 0.652 | 0.785 | 0.992 | 0.984 | 0.988 | 0.974 | 0.970 | 0.970 | 0.985 | 0.957 | 0.959 | 0.965 | 0.982 | 0.968 | 0.970 | 0.948 | 0.937 |

**Note :** Group 1 = non-contrast + 1.25 mm + standard convolution kernel; Group 2 = contrast enhancement + 1.25 mm + standard convolution kernel; Group 3 = non-contrast + 5 mm + standard convolution kernel; Group 4 = non-contrast + 5 mm + lung convolution kernel.



**Supplementary Table S3. Univariate association of radiomics features with the status of SPN in the primary and validation cohort**

| radiomics features | Group 1        |        |                   |        | radiomics features | Group 2        |        |                   |        | radiomics features  | Group 3        |        |                   |        | radiomics features | Group 4        |        |                   |        |
|--------------------|----------------|--------|-------------------|--------|--------------------|----------------|--------|-------------------|--------|---------------------|----------------|--------|-------------------|--------|--------------------|----------------|--------|-------------------|--------|
|                    | Primary cohort |        | Validation cohort |        |                    | Primary cohort |        | Validation cohort |        |                     | Primary cohort |        | Validation cohort |        |                    | Primary cohort |        | Validation cohort |        |
|                    | AUC            | P      | AUC               | P      |                    | AUC            | P      | AUC               | P      |                     | AUC            | P      | AUC               | P      |                    | AUC            | P      | AUC               | P      |
| energy_0_0         | 0.784          | <0.001 | 0.750             | <0.001 | energy_0_0         | 0.729          | <0.001 | 0.763             | <0.001 | energy_90_0         | 0.694          | <0.001 | 0.657             | 0.010  | energy_45_0        | 0.736          | <0.001 | 0.688             | 0.002  |
| energy_45_0        | 0.791          | <0.001 | 0.755             | <0.001 | energy_45_0        | 0.776          | <0.001 | 0.689             | 0.002  | energy_135_0        | 0.720          | 0.001  | 0.654             | 0.012  | energy_90_0        | 0.727          | <0.001 | 0.696             | 0.001  |
| energy_90_0        | 0.790          | <0.001 | 0.756             | <0.001 | energy_90_0        | 0.728          | <0.001 | 0.767             | <0.001 | homogeneity_135_0   | 0.702          | 0.003  | 0.630             | 0.033  | energy_135_0       | 0.737          | <0.001 | 0.711             | <0.001 |
| energy_135_0       | 0.791          | <0.001 | 0.756             | <0.001 | energy_135_0       | 0.721          | <0.001 | 0.779             | <0.001 | entropy_0_0         | 0.680          | <0.001 | 0.690             | 0.002  | homogeneity_45_0   | 0.674          | 0.004  | 0.643             | 0.019  |
| homogeneity_0_0    | 0.692          | 0.002  | 0.635             | 0.027  | homogeneity_0_0    | 0.644          | 0.019  | 0.657             | 0.010  | entropy_45_0        | 0.721          | <0.001 | 0.659             | 0.009  | homogeneity_90_0   | 0.672          | 0.005  | 0.633             | 0.030  |
| homogeneity_45_0   | 0.738          | <0.001 | 0.657             | 0.010  | homogeneity_45_0   | 0.671          | 0.005  | 0.622             | 0.046  | entropy_90_0        | 0.728          | <0.001 | 0.690             | 0.008  | homogeneity_135_0  | 0.659          | 0.009  | 0.674             | 0.004  |
| homogeneity_90_0   | 0.710          | <0.001 | 0.646             | 0.017  | homogeneity_135_0  | 0.675          | 0.004  | 0.696             | 0.001  | entropy_135_0       | 0.749          | <0.001 | 0.689             | 0.020  | entropy_0_0        | 0.726          | <0.001 | 0.709             | <0.001 |
| homogeneity_135_0  | 0.719          | <0.001 | 0.710             | 0.001  | entropy_0_0        | 0.716          | <0.001 | 0.739             | <0.001 | his_mean_0          | 0.729          | 0.013  | 0.662             | 0.037  | entropy_45_0       | 0.744          | <0.001 | 0.693             | 0.002  |
| entropy_0_0        | 0.771          | <0.001 | 0.732             | <0.001 | entropy_45_0       | 0.733          | <0.001 | 0.753             | <0.001 | his_50_mean_0       | 0.652          | 0.023  | 0.642             | 0.006  | entropy_90_0       | 0.729          | <0.001 | 0.701             | 0.001  |
| entropy_45_0       | 0.784          | <0.001 | 0.739             | <0.001 | entropy_90_0       | 0.722          | <0.001 | 0.745             | <0.001 | his_25_mean_0       | 0.639          | 0.013  | 0.628             | 0.012  | entropy_135_0      | 0.744          | <0.001 | 0.719             | <0.001 |
| entropy_90_0       | 0.779          | <0.001 | 0.739             | <0.001 | entropy_135_0      | 0.721          | <0.001 | 0.767             | <0.001 | his_10_mean_0       | 0.652          | 0.033  | 0.668             | <0.001 | his_mean_0         | 0.646          | 0.017  | 0.690             | 0.002  |
| entropy_135_0      | 0.786          | <0.001 | 0.753             | <0.001 | skewness_1.0       | 0.717          | <0.001 | 0.644             | 0.019  | his_10_SD_0         | 0.630          | 0.035  | 0.654             | 0.002  | his_25_mean_0      | 0.650          | 0.014  | 0.655             | 0.011  |
| entropy_mean_0     | 0.632          | 0.030  | 0.656             | 0.011  | energy_0_1.0       | 0.715          | <0.001 | 0.694             | 0.001  | energy_0_1.0        | 0.629          | <0.001 | 0.729             | <0.001 | his_25_SD_0        | 0.623          | 0.044  | 0.640             | 0.022  |
| entropy_25_mean_0  | 0.653          | 0.010  | 0.644             | 0.018  | energy_45_1.0      | 0.737          | <0.001 | 0.707             | <0.001 | energy_45_1.0       | 0.761          | <0.001 | 0.693             | <0.001 | energy_0_1.0       | 0.712          | <0.001 | 0.705             | <0.001 |
| energy_0_1.0       | 0.727          | <0.001 | 0.673             | 0.005  | energy_90_1.0      | 0.715          | <0.001 | 0.690             | 0.002  | energy_90_1.0       | 0.769          | <0.001 | 0.732             | <0.001 | energy_45_1.0      | 0.740          | <0.001 | 0.702             | <0.001 |
| energy_45_1.0      | 0.757          | <0.001 | 0.695             | 0.001  | energy_135_1.0     | 0.703          | <0.001 | 0.721             | <0.001 | energy_135_1.0      | 0.764          | <0.001 | 0.748             | <0.001 | energy_90_1.0      | 0.739          | <0.001 | 0.695             | 0.001  |
| energy_90_1.0      | 0.765          | <0.001 | 0.699             | 0.001  | entropy_0_1.0      | 0.714          | <0.001 | 0.707             | 0.001  | homogeneity_90_1.0  | 0.784          | <0.001 | 0.621             | 0.049  | energy_135_1.0     | 0.695          | 0.001  | 0.713             | <0.001 |
| energy_135_1.0     | 0.761          | <0.001 | 0.703             | <0.001 | entropy_45_1.0     | 0.732          | <0.001 | 0.717             | <0.001 | homogeneity_135_1.0 | 0.733          | 0.004  | 0.668             | 0.006  | entropy_0_1.0      | 0.732          | <0.001 | 0.711             | <0.001 |
| homogeneity_90_1.0 | 0.693          | 0.002  | 0.648             | 0.015  | entropy_90_1.0     | 0.710          | <0.001 | 0.692             | 0.002  | entropy_0_1.0       | 0.674          | <0.001 | 0.737             | <0.001 | entropy_45_1.0     | 0.751          | <0.001 | 0.707             | 0.001  |
| entropy_0_1.0      | 0.727          | <0.001 | 0.693             | 0.002  | entropy_135_1.0    | 0.691          | 0.002  | 0.732             | <0.001 | entropy_45_1.0      | 0.748          | <0.001 | 0.708             | 0.001  | entropy_90_1.0     | 0.753          | <0.001 | 0.699             | 0.001  |
| entropy_45_1.0     | 0.757          | <0.001 | 0.706             | <0.001 | kurtosis_1.5       | 0.673          | 0.005  | 0.701             | 0.001  | entropy_90_1.0      | 0.767          | <0.001 | 0.740             | <0.001 | entropy_135_1.0    | 0.706          | 0.001  | 0.716             | <0.001 |

|                  |       |        |       |        |                     |       |        |       |        |                 |       |        |       |                    |                     |        |        |       |        |
|------------------|-------|--------|-------|--------|---------------------|-------|--------|-------|--------|-----------------|-------|--------|-------|--------------------|---------------------|--------|--------|-------|--------|
| ropy_90_1.0      | 0.765 | <0.001 | 0.706 | 0.001  | energy_0_1.5        | 0.729 | <0.001 | 0.766 | <0.001 | entropy_135_1.0 | 0.756 | <0.001 | 0.747 | <0.001             | his_mean_1.0        | 0.646  | 0.017  | 0.690 | 0.002  |
| ropy_135_1.0     | 0.761 | <0.001 | 0.722 | <0.001 | energy_45_1.5       | 0.727 | <0.001 | 0.757 | <0.001 | his_mean_1.0    | 0.774 | 0.013  | 0.662 | 0.008              | energy_0_1.5        | 0.700  | 0.001  | 0.710 | <0.001 |
| _mean_1.0        | 0.632 | 0.031  | 0.656 | 0.011  | energy_90_1.5       | 0.727 | <0.001 | 0.773 | <0.001 | his_50_mean_1.0 | 0.652 | 0.022  | 0.646 | 0.017              | energy_45_1.5       | 0.730  | <0.001 | 0.704 | 0.001  |
| _50_mean_1.0     | 0.620 | 0.049  | 0.640 | 0.022  | energy_135_1.5      | 0.721 | <0.001 | 0.780 | <0.001 | his_25_SD_1.0   | 0.640 | 0.003  | 0.628 | 0.036              | energy_90_1.5       | 0.728  | <0.001 | 0.703 | 0.001  |
| _25_mean_1.0     | 0.623 | 0.044  | 0.637 | 0.026  | homogeneity_90_1.5  | 0.674 | 0.004  | 0.631 | 0.032  | entropy_0_1.5   | 0.684 | 0.003  | 0.652 | 0.013              | energy_135_1.5      | 0.715  | <0.001 | 0.729 | <0.001 |
| _25_SD_1.0       | 0.657 | 0.010  | 0.686 | 0.002  | homogeneity_135_1.5 | 0.687 | 0.002  | 0.709 | <0.001 | entropy_90_1.5  | 0.683 | <0.001 | 0.658 | 0.010              | homogeneity_45_1.5  | 0.681  | 0.003  | 0.623 | 0.045  |
| tosis_1.5        | 0.703 | 0.001  | 0.699 | 0.001  | entropy_0_1.5       | 0.723 | <0.001 | 0.738 | <0.001 | entropy_135_1.5 | 0.721 | 0.001  | 0.644 | 0.018              | homogeneity_90_1.5  | 0.740  | <0.001 | 0.641 | 0.021  |
| ergy_0_1.5       | 0.769 | <0.001 | 0.773 | <0.001 | entropy_45_1.5      | 0.736 | <0.001 | 0.746 | <0.001 | his_mean_1.5    | 0.695 | 0.013  | 0.662 | 0.008              | homogeneity_135_1.5 | 0.675  | 0.004  | 0.661 | 0.008  |
| ergy_45_1.5      | 0.771 | <0.001 | 0.769 | <0.001 | entropy_90_1.5      | 0.713 | <0.001 | 0.748 | <0.001 | his_50_mean_1.5 | 0.652 | 0.017  | 0.642 | 0.021              | entropy_0_1.5       | 0.707  | <0.001 | 0.708 | <0.001 |
| ergy_90_1.5      | 0.779 | <0.001 | 0.781 | <0.001 | entropy_135_1.5     | 0.717 | <0.001 | 0.761 | <0.001 | his_25_mean_1.5 | 0.646 | 0.015  | 0.627 | 0.038              | entropy_45_1.5      | 0.747  | <0.001 | 0.703 | <0.001 |
| ergy_135_1.5     | 0.776 | <0.001 | 0.776 | <0.001 | kurtosis_2.0        | 0.644 | 0.018  | 0.702 | <0.001 | his_mean_2.0    | 0.649 | 0.013  | 0.662 | 0.008              | entropy_90_1.5      | 0.733  | <0.001 | 0.701 | <0.001 |
| ogeneity_45_1.5  | 0.743 | <0.001 | 0.654 | 0.012  | energy_0_2.0        | 0.723 | <0.001 | 0.763 | <0.001 | his_50_mean_2.0 | 0.652 | 0.044  | 0.642 | 0.020              | entropy_135_1.5     | 0.719  | <0.001 | 0.726 | <0.001 |
| ogeneity_90_1.5  | 0.716 | <0.001 | 0.663 | 0.008  | energy_45_2.0       | 0.716 | <0.001 | 0.761 | <0.001 | his_25_mean_2.0 | 0.624 | 0.016  | 0.630 | 0.034              | his_mean_1.5        | 0.646  | 0.017  | 0.690 | 0.002  |
| ogeneity_135_1.5 | 0.699 | 0.001  | 0.686 | 0.002  | energy_90_2.0       | 0.720 | <0.001 | 0.777 | <0.001 | his_10_mean_2.0 | 0.647 | 0.023  | 0.624 | 0.042              | his_25_mean_1.5     | 0.647  | 0.016  | 0.656 | 0.011  |
| ropy_0_1.5       | 0.754 | <0.001 | 0.733 | <0.001 | energy_135_2.0      | 0.711 | <0.001 | 0.772 | <0.001 | his_mean_2.5    | 0.639 | 0.013  | 0.662 | 0.008              | his_25_SD_1.5       | 0.627  | 0.037  | 0.635 | 0.028  |
| ropy_45_1.5      | 0.767 | <0.001 | 0.754 | <0.001 | homogeneity_135_2.0 | 0.689 | 0.002  | 0.712 | 0.001  | his_SD_2.5      | 0.622 | 0.046  | 0.620 | 0.049              | his_10_mean_1.5     | 0.626  | 0.039  | 0.687 | 0.002  |
| ropy_90_1.5      | 0.764 | <0.001 | 0.743 | <0.001 | entropy_0_2.0       | 0.718 | <0.001 | 0.737 | <0.001 | his_50_mean_2.5 | 0.622 | 0.047  | 0.644 | 0.019              | his_10_SD_1.5       | 0.633  | 0.029  | 0.689 | 0.002  |
| ropy_135_1.5     | 0.769 | <0.001 | 0.752 | <0.001 | entropy_45_2.0      | 0.721 | <0.001 | 0.733 | <0.001 | his_25_mean_2.5 | 0.649 | 0.015  | 0.628 | 0.037              | energy_0_2.0        | 0.667  | 0.006  | 0.663 | 0.008  |
| _mean_1.5        | 0.632 | 0.031  | 0.656 | 0.011  | entropy_90_2.0      | 0.722 | <0.001 | 0.746 | <0.001 |                 |       |        |       | energy_45_2.0      | 0.686               | 0.002  | 0.651  | 0.013 |        |
| _25_mean_1.5     | 0.654 | 0.012  | 0.647 | 0.017  | entropy_135_2.0     | 0.715 | <0.001 | 0.754 | <0.001 |                 |       |        |       | energy_90_2.0      | 0.701               | 0.001  | 0.670  | 0.005 |        |
| ergy_0_2.0       | 0.716 | <0.001 | 0.743 | <0.001 | his_25_mean_2.0     | 0.631 | 0.032  | 0.630 | 0.034  |                 |       |        |       | energy_135_2.0     | 0.679               | 0.003  | 0.671  | 0.005 |        |
| ergy_45_2.0      | 0.722 | <0.001 | 0.742 | <0.001 | energy_0_2.5        | 0.702 | <0.001 | 0.750 | <0.001 |                 |       |        |       | homogeneity_90_2.0 | 0.768               | <0.001 | 0.649  | 0.015 |        |
| ergy_90_2.0      | 0.731 | <0.001 | 0.763 | <0.001 | energy_45_2.5       | 0.670 | 0.001  | 0.751 | <0.001 |                 |       |        |       | entropy_0_2.0      | 0.690               | 0.002  | 0.680  | 0.003 |        |
| ergy_135_2.0     | 0.709 | <0.001 | 0.750 | <0.001 | energy_90_2.5       | 0.702 | <0.001 | 0.760 | <0.001 |                 |       |        |       | entropy_45_2.0     | 0.721               | <0.001 | 0.669  | 0.006 |        |
| ogeneity_45_2.0  | 0.667 | 0.006  | 0.623 | 0.044  | energy_135_2.5      | 0.695 | 0.001  | 0.755 | <0.001 |                 |       |        |       | entropy_90_2.0     | 0.727               | <0.001 | 0.677  | 0.004 |        |
| ogeneity_90_2.0  | 0.717 | <0.001 | 0.693 | 0.002  | homogeneity_135_2.5 | 0.668 | 0.006  | 0.693 | 0.002  |                 |       |        |       | entropy_135_2.0    | 0.700               | 0.001  | 0.677  | 0.004 |        |

|                     |       |        |       |        |                 |       |        |       |        |                    |       |        |       |       |
|---------------------|-------|--------|-------|--------|-----------------|-------|--------|-------|--------|--------------------|-------|--------|-------|-------|
| homogeneity_135_2.0 | 0.627 | 0.037  | 0.681 | 0.003  | entropy_0_2.5   | 0.690 | 0.002  | 0.732 | <0.001 | his_mean_2.0       | 0.646 | 0.017  | 0.690 | 0.002 |
| ropy_0_2.0          | 0.728 | <0.001 | 0.737 | <0.001 | entropy_45_2.5  | 0.703 | <0.001 | 0.718 | <0.001 | his_25_mean_2.0    | 0.651 | 0.013  | 0.638 | 0.024 |
| ropy_45_2.0         | 0.741 | <0.001 | 0.744 | <0.001 | entropy_90_2.5  | 0.707 | <0.001 | 0.736 | <0.001 | his_10_mean_2.0    | 0.628 | 0.036  | 0.671 | 0.005 |
| ropy_90_2.0         | 0.750 | <0.001 | 0.752 | <0.001 | entropy_135_2.5 | 0.700 | 0.001  | 0.736 | <0.001 | energy_0_2.5       | 0.632 | 0.031  | 0.645 | 0.018 |
| ropy_135_2.0        | 0.722 | <0.001 | 0.746 | <0.001 | his_25_mean_2.5 | 0.632 | 0.031  | 0.622 | 0.046  | energy_45_2.5      | 0.655 | 0.011  | 0.626 | 0.040 |
| _mean_2.0           | 0.632 | 0.031  | 0.656 | 0.011  |                 |       |        |       |        | energy_90_2.5      | 0.665 | 0.007  | 0.648 | 0.015 |
| _25_mean_2.0        | 0.656 | 0.011  | 0.626 | 0.039  |                 |       |        |       |        | energy_135_2.5     | 0.644 | 0.018  | 0.667 | 0.006 |
| ergy_0_2.5          | 0.684 | 0.003  | 0.728 | <0.001 |                 |       |        |       |        | homogeneity_90_2.5 | 0.756 | <0.001 | 0.630 | 0.033 |
| ergy_45_2.5         | 0.685 | 0.002  | 0.729 | <0.001 |                 |       |        |       |        | entropy_0_2.5      | 0.660 | 0.009  | 0.665 | 0.007 |
| ergy_90_2.5         | 0.704 | <0.001 | 0.750 | <0.001 |                 |       |        |       |        | entropy_45_2.5     | 0.696 | 0.001  | 0.638 | 0.024 |
| ergy_135_2.5        | 0.669 | 0.006  | 0.739 | <0.001 |                 |       |        |       |        | entropy_90_2.5     | 0.689 | 0.002  | 0.655 | 0.011 |
| ogeneity_90_2.5     | 0.710 | <0.001 | 0.682 | 0.003  |                 |       |        |       |        | entropy_135_2.5    | 0.662 | 0.008  | 0.661 | 0.008 |
| ogeneity_135_2.5    | 0.623 | 0.045  | 0.664 | 0.007  |                 |       |        |       |        | his_mean_2.5       | 0.646 | 0.017  | 0.690 | 0.002 |
| ropy_0_2.5          | 0.686 | 0.002  | 0.727 | <0.001 |                 |       |        |       |        | his_25_mean_2.5    | 0.651 | 0.013  | 0.633 | 0.030 |
| ropy_45_2.5         | 0.717 | <0.001 | 0.729 | <0.001 |                 |       |        |       |        | his_10_mean_2.5    | 0.620 | 0.049  | 0.659 | 0.009 |
| ropy_90_2.5         | 0.716 | <0.001 | 0.744 | <0.001 |                 |       |        |       |        |                    |       |        |       |       |
| ropy_135_2.5        | 0.683 | 0.003  | 0.729 | <0.001 |                 |       |        |       |        |                    |       |        |       |       |
| _mean_2.5           | 0.632 | 0.031  | 0.656 | 0.011  |                 |       |        |       |        |                    |       |        |       |       |
| _25_mean_2.5        | 0.655 | 0.011  | 0.625 | 0.042  |                 |       |        |       |        |                    |       |        |       |       |

**Note:** Group 1 = non-contrast + 1.25 mm + standard convolution kernel; Group 2 = contrast enhancement + 1.25 mm + standard convolution kernel; Group 3 = non-contrast + 5 mm + standard convolution kernel; Group 4 = non-contrast + 5 mm + lung convolution kernel. **p**-value is derived from the univariable association analyses between each of the features and the SPN status.

**Supplementary Table S4.** Radiomics features with non-zero coefficient selected in lasso logistic regression

| Group 1            |             | Group 2             |             | Group 3            |             | Group 4            |             |
|--------------------|-------------|---------------------|-------------|--------------------|-------------|--------------------|-------------|
| Radiomics features | Coefficient | Radiomics features  | Coefficient | Radiomics features | Coefficient | Radiomics features | Coefficient |
| homogeneity_90_0   | 13.212      | energy_45_0         | -40.801     | energy_45_1.0      | -51.722     | entropy_45_0       | 6.607       |
| entropy_135_0      | 18.548      | skewness_1.0        | -2.462      | energy_135_1.0     | -88.518     | entropy_45_1.0     | 5.495       |
| his_mean_0         | -0.00002    | entropy_45_1.0      | 12.074      | homogeneity_90_1.0 | -8.326      | homogeneity_90_2.0 | -9.753      |
| entropy_135_1.0    | 1.042       | homogeneity_135_2.0 | -5.160      |                    |             |                    |             |
| his_50_mean_1.0    | -0.003      |                     |             |                    |             |                    |             |
| his_25_mean_1.0    | 0.005       |                     |             |                    |             |                    |             |
| energy_135_1.5     | -7.874      |                     |             |                    |             |                    |             |
| homogeneity_45_1.5 | -13.146     |                     |             |                    |             |                    |             |
| homogeneity_90_1.5 | 9.096       |                     |             |                    |             |                    |             |
| his_mean_2.0       | -0.002      |                     |             |                    |             |                    |             |
| homogeneity_90_2.5 | -29.415     |                     |             |                    |             |                    |             |
| entropy_0_2.5      | -13.273     |                     |             |                    |             |                    |             |

**Note:** Group 1 = non-contrast + 1.25 mm + standard convolution kernel; Group 2 = contrast enhancement + 1.25 mm + standard convolution kernel; Group 3 = non-contrast + 5 mm + standard convolution kernel; Group 4 = non-contrast + 5 mm + lung convolution kernel.

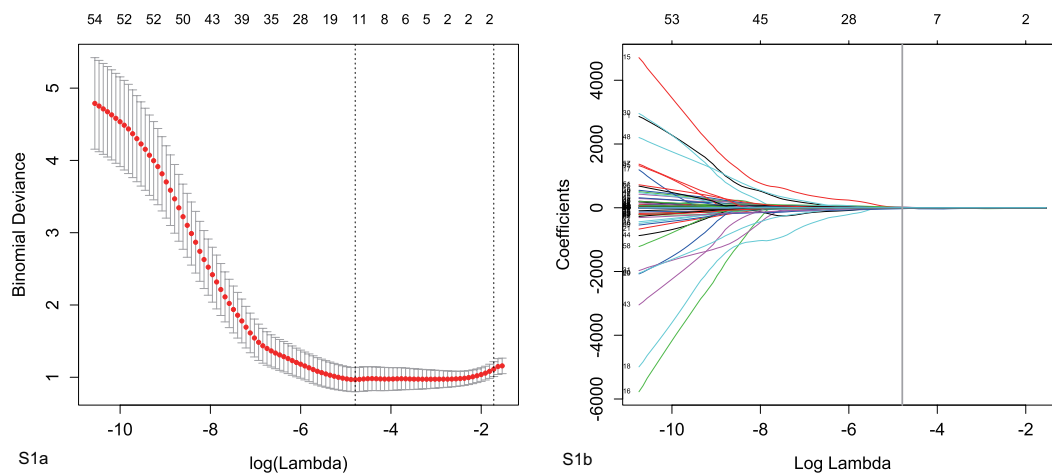

**Supplementary Figure S1.** Representative diagram for feature selection using the LASSO logistic regression analysis in group 1 (non-contrast + 1.25 mm + standard convolution kernel). Figure S1a indicated tuning parameter ( $\lambda$ ) selection in the LASSO model used 10-fold cross-validation via minimum criteria. The binomial deviance curve was plotted versus  $\log(\lambda)$ . The dotted vertical lines were drawn at the optimal values using the minimum criteria and the 1-SE criteria. A value  $\lambda$  of 0.008 with  $\log(\lambda)=-4.828$  was chosen (minimum criteria) according to 10-fold cross-validation. Figure S1b indicated LASSO coefficient profiles of the 66 radiomics features. A coefficient profile plot was produced against the log-lambda sequence. The vertical line was drawn at the value selected using 10-fold cross-validation, where the optimal  $\lambda$  resulted in 12 non-zero coefficients.

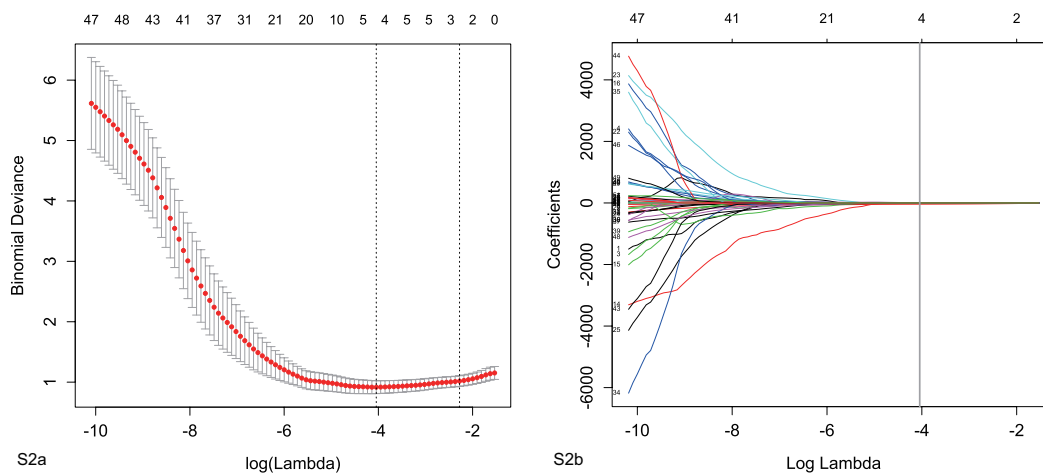

**Supplementary Figure S2.** Representative diagram for feature selection using the LASSO logistic regression analysis in group 2 (contrast enhancement + 1.25 mm + standard convolution kernel). Figure S2a indicated tuning parameter ( $\lambda$ ) selection in the LASSO model used 10-fold cross-validation via minimum criteria. The binomial deviance curve was plotted versus  $\log(\lambda)$ . The dotted vertical lines were drawn at the optimal values using the minimum criteria and the 1-SE criteria. A value  $\lambda$  of 0.018 with  $\log(\lambda) = -4.017$  was chosen (minimum criteria) according to 10-fold cross-validation. Figure S2b indicated LASSO coefficient profiles of the 52 radiomics features. A coefficient profile plot was produced against the log-lambda sequence. The vertical line was drawn at the value selected using 10-fold cross-validation, where the optimal  $\lambda$  resulted in 4 non-zero coefficients.

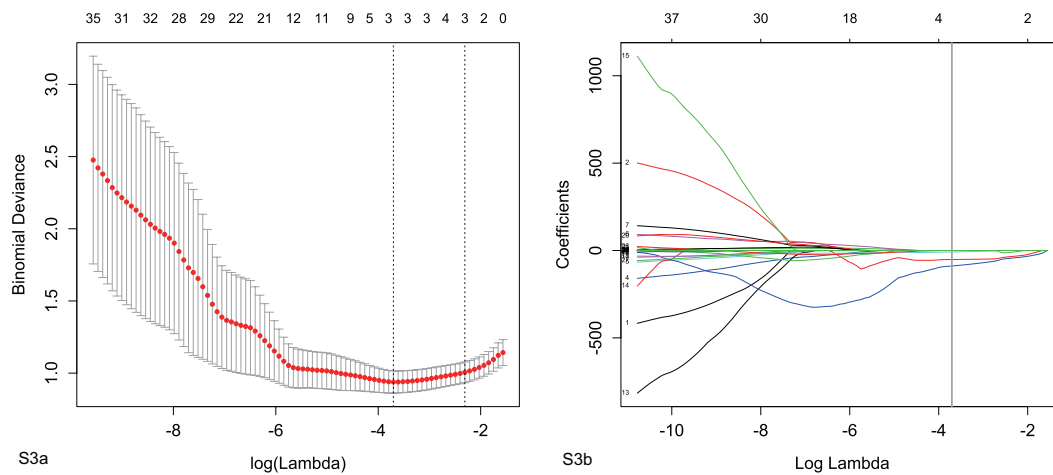

**Supplementary Figure S3.** Representative diagram for feature selection using the LASSO logistic regression analysis in group 3 (non-contrast + 5 mm + standard convolution kernel). Figure S3a indicated tuning parameter ( $\lambda$ ) selection in the LASSO model used 10-fold cross-validation via minimum criteria. The binomial deviance curve was plotted versus  $\log(\lambda)$ . The dotted vertical lines were drawn at the optimal values using the minimum criteria and the 1-SE criteria. A value  $\lambda$  of 0.025 with  $\log(\lambda)=-3.689$  was chosen (minimum criteria) according to 10-fold cross-validation. Figure S3b indicated LASSO coefficient profiles of the 39 radiomics features. A coefficient profile plot was produced against the log-lambda sequence. The vertical line was drawn at the value selected using 10-fold cross-validation, where the optimal  $\lambda$  resulted in 3 non-zero coefficients.

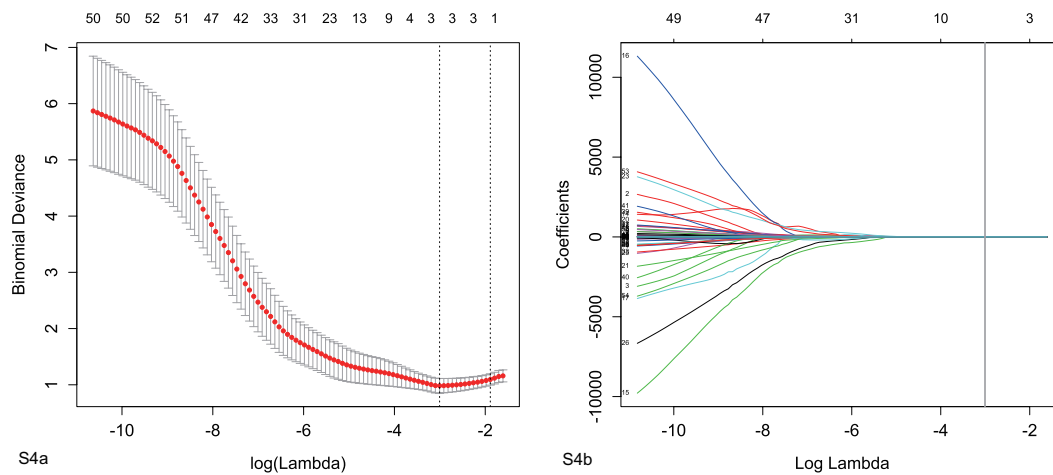

**Supplementary Figure S4.** Representative diagram for feature selection using the LASSO logistic regression analysis in group 4 (non-contrast + 5 mm + lung convolution kernel). Figure S4a indicated tuning parameter ( $\lambda$ ) selection in the LASSO model used 10-fold cross-validation via minimum criteria. The binomial deviance curve was plotted versus  $\log(\lambda)$ . The dotted vertical lines were drawn at the optimal values using the minimum criteria and the 1-SE criteria. A value  $\lambda$  of 0.050 with  $\log(\lambda) = -2.996$  was chosen (minimum criteria) according to 10-fold cross-validation. Figure S4b indicated LASSO coefficient profiles of the 62 radiomics features. A coefficient profile plot was produced against the log-lambda sequence. The vertical line was drawn at the value selected using 10-fold cross-validation, where the optimal  $\lambda$  resulted in 3 non-zero coefficients.



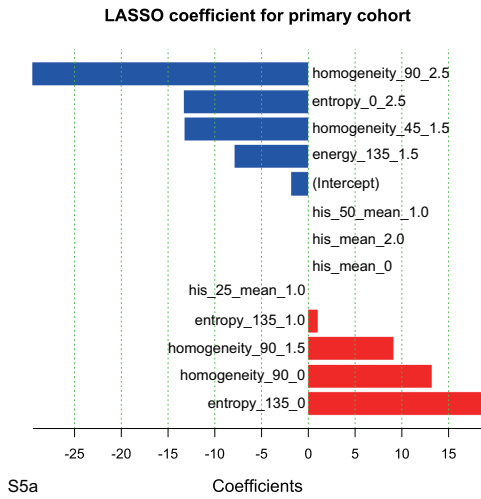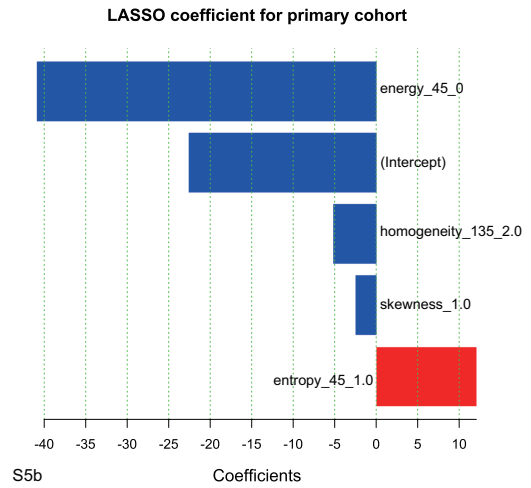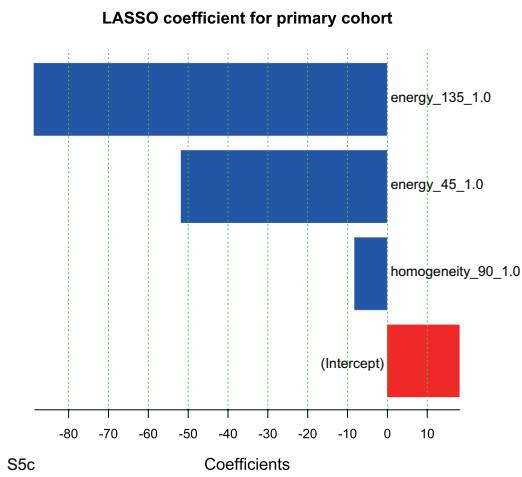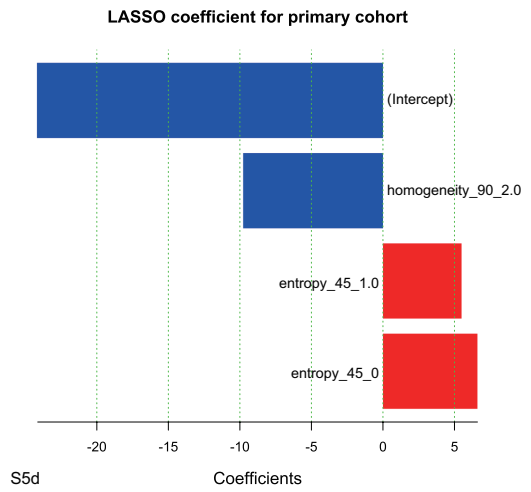

**Supplementary Figure S5** Histogram of features selected by non-zero coefficients in the Lasso logistic regression analysis in group 1 (Figure S5a), group 2 (Figure S5b), group 3 (Figure S5c) and group 4 (Figure S5d). Y axis indicated the selected features and X axis indicated the value of the positive (red histogram) or negative (blue histogram) coefficients. 12, 4, 3 and 3 different features were selected in group 1, 2, 3 and 4, respectively.
